# Supplementary material for: Kinetic Study on Microwave-Assisted Oligomerization of 1-Decene over a HY Catalyst
Source: MDPI journal article supplement (doi:10.3390/catal11091105), 2021-09-14
Supplement: s1 [file s1]

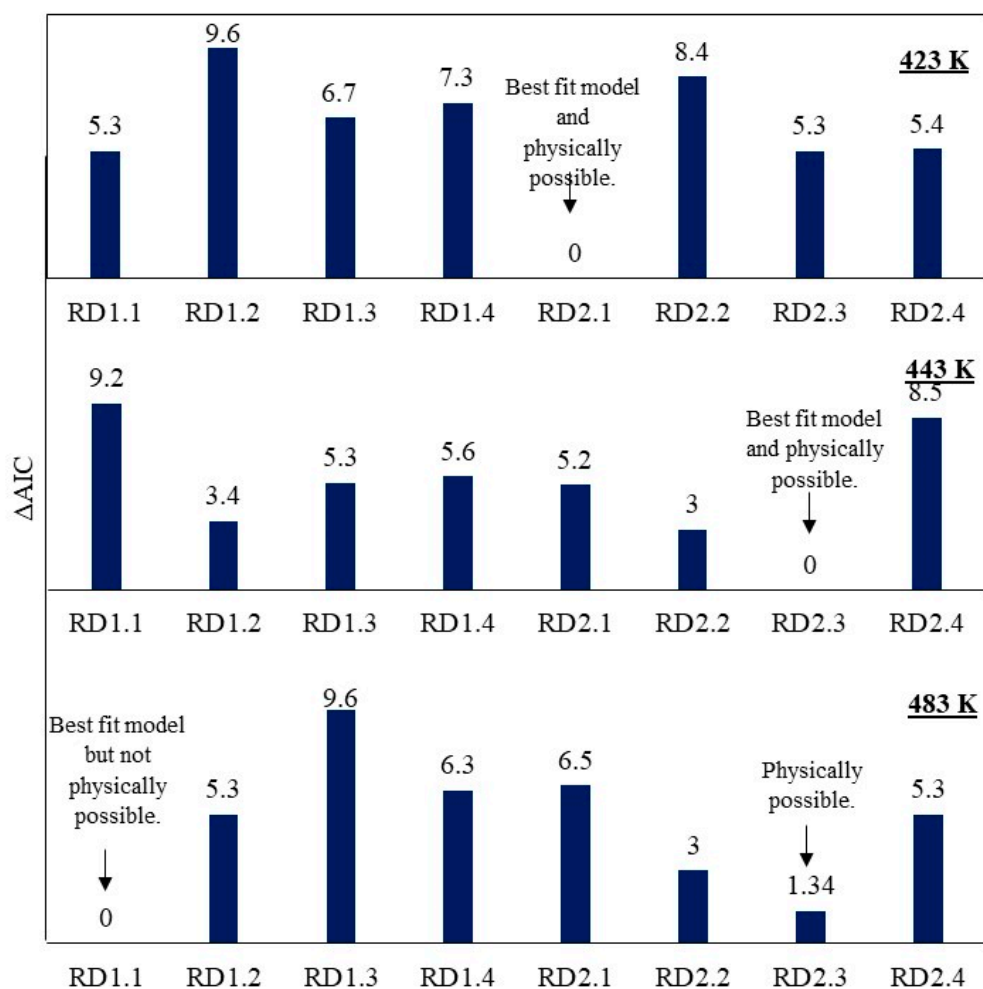

**Figure S1** Different dimerization kinetic models at different reaction temperatures using the AIC method.

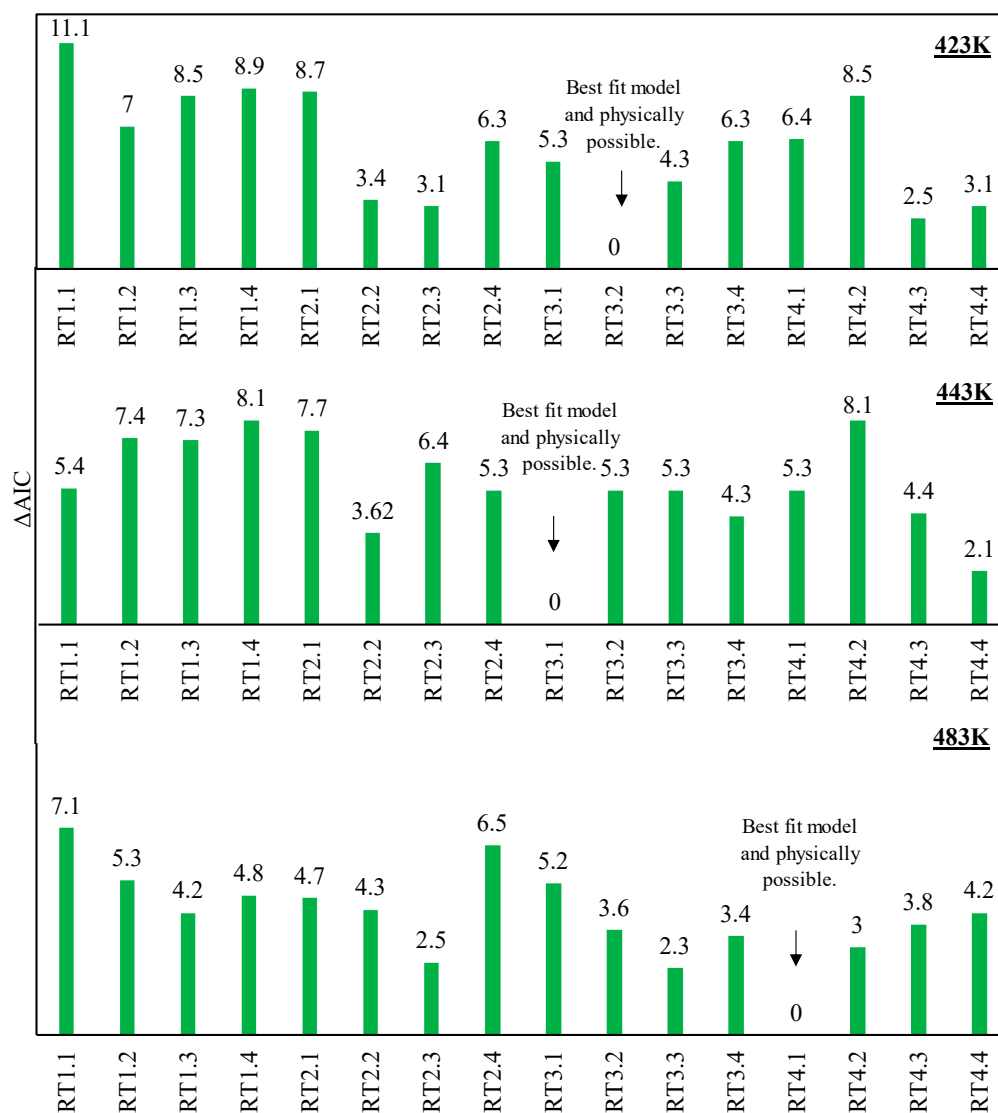

**Figure S2** Comparison different trimerization kinetic equation models at different reaction temperatures using the AIC method.
